# Supplementary material for: Associations of collagen type 1 α1 gene polymorphisms and musculoskeletal soft tissue injuries: a meta-analysis with trial sequential analysis
Source: publisher site journal article supplement (doi:10.18632/aging.205846), 2024-05-22
Supplement: Supplementary file [file aging-v16i10-205846-supplementary-material-SD1.pdf]

## SUPPLEMENTARY TABLE

Supplementary Table 1. Results of Egger's and Begg's tests.

| Polymorphisms           | Egger's test    |                 | Begg's test     |                 |
|-------------------------|-----------------|-----------------|-----------------|-----------------|
|                         | <i>t</i> -value | <i>P</i> -value | <i>Z</i> -value | <i>P</i> -value |
| <b><i>Rs180012</i></b>  |                 |                 |                 |                 |
| T vs. G                 | 0.61            | 0.055           | 0.21            | 0.837           |
| TT vs. GG               | -2.21           | 0.557           | 1.56            | 0.119           |
| TG vs. GG               | 0.87            | 0.407           | 0.89            | 0.373           |
| TT+TG vs. GG            | 1.54            | 0.155           | 0.89            | 0.373           |
| TT vs. TG+GG            | -2.32           | 0.051           | 1.56            | 0.119           |
| <b><i>Rs1107946</i></b> |                 |                 |                 |                 |
| T vs. G                 | 0.90            | 0.397           | 0.73            | 0.466           |
| TT vs. GG               | -1.24           | 0.253           | 0.94            | 0.348           |
| TG vs. GG               | 0.78            | 0.459           | 1.15            | 0.251           |
| TT+TG vs. GG            | 1.09            | 0.311           | 1.15            | 0.251           |
| TT vs. TG+GG            | -1.76           | 0.122           | 1.15            | 0.251           |
